# Supplementary material for: Contrasting seasonal patterns in particle aggregation and DOM transformation in a sub-Arctic fjord
Source: Copernicus journal article supplement (doi:10.5194/egusphere-2024-1314), 2024-06-05
Supplement: Supplementary file [file egusphere-2024-1314-AC1-supplement.pdf]

**Table 2: High resolution mass spectrometry results of DOM variables showing mean intensity weighted average of hydrogen to carbon ( $H/C_{wa}$ ), oxygen to carbon ( $O/C_{wa}$ ), molecular weight ( $MW_{wa}$ ) and modified aromaticity index ( $AI_{mod\ wa}$ ). SEM= standard error of difference between means. N = 3 for the start of incubation (t0) and end of incubation (t1) (36 hours) for filtered (F) water treatment.**

| Treatment | $H/C_{wa}$ (SEM) | $O/C_{wa}$ (SEM) | $MW_{wa}$ (SEM) | $AI_{mod\ wa}$ (SEM) |
|-----------|------------------|------------------|-----------------|----------------------|
| Sep t0    | 1.31 (0.007)     | 0.49 (0.006)     | 361.40 (3)      | 0.21 (0.002)         |
| Sep t1    | 1.25 (0.007)     | 0.52 (0.005)     | 365.09 (2)      | 0.24 (0.002)         |
| Oct t0    | 1.27 (0.002)     | 0.51 (0.001)     | 364.53 (0)      | 0.23 (0.001)         |
| Oct t1    | 1.27 (0.006)     | 0.51 (0.005)     | 361.95 (1)      | 0.22 (0.002)         |
| Dec t0    | 1.28 (0.002)     | 0.51 (0.001)     | 369.83 (1)      | 0.22 (0.001)         |
| Dec t1    | 1.29 (0.004)     | 0.51 (0.002)     | 366.95 (0)      | 0.22 (0.001)         |
| Feb t0    | 1.28 (0.001)     | 0.51 (0.004)     | 366.05 (0)      | 0.22 (0.001)         |
| Feb t1    | 1.30 (0.002)     | 0.50 (0.002)     | 363.38 (2)      | 0.21 (0.001)         |

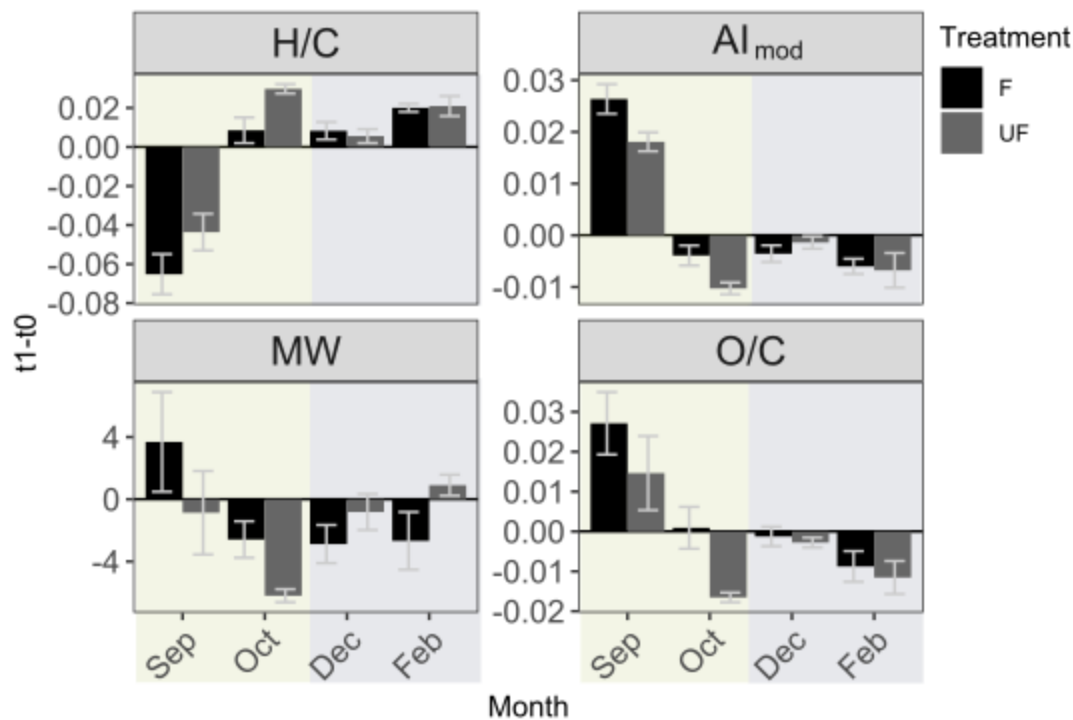

**Figure 5: Change of DOM parameters during experiment incubations.** a) change in intensity weighted average DOM parameters in seawater at t1 relative to t0. a) molecular weight (MW), b) oxygen to carbon ratio (O/C), c) hydrogen to carbon ratio (H/C), d) modified aromaticity index ( $AI_{mod}$ ). The first treatment is filtered (F) seawater at start and end of incubation (t1 – t0) and the second treatment is unfiltered (UF) seawater for the duration of the incubation then filtered immediately prior to sampling and compared to filtered at the start (t0) incubation (t1 – t0). The background colors indicate the statistically identified winter (blue) and biologically productive (green) period, respectively.

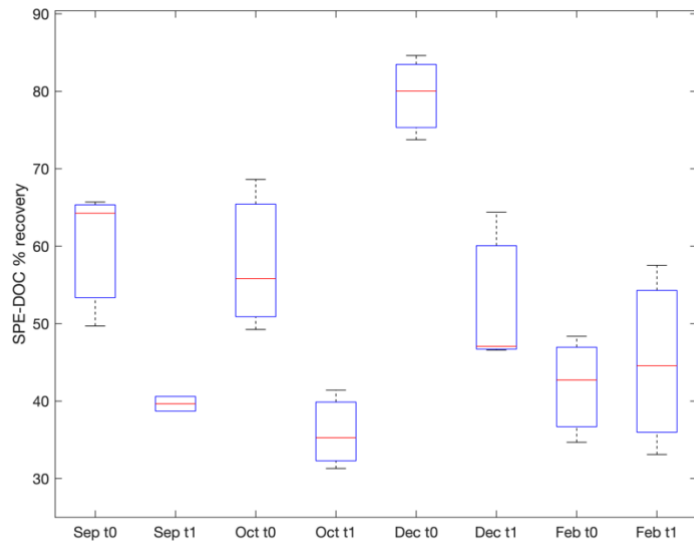

**Boxplot of SPE-DOC % recovery:** This figure shows the SPE-DOC % recovery for the treatments at the start (t0) and end of incubation (t1).
