# Supplementary material for: Contrasting seasonal patterns in particle aggregation and DOM transformation in a sub-Arctic fjord
Source: Copernicus journal article supplement (doi:10.5194/egusphere-2024-1314), 2024-06-05
Supplement: Supplementary file [file egusphere-2024-1314-AC2-supplement.pdf]

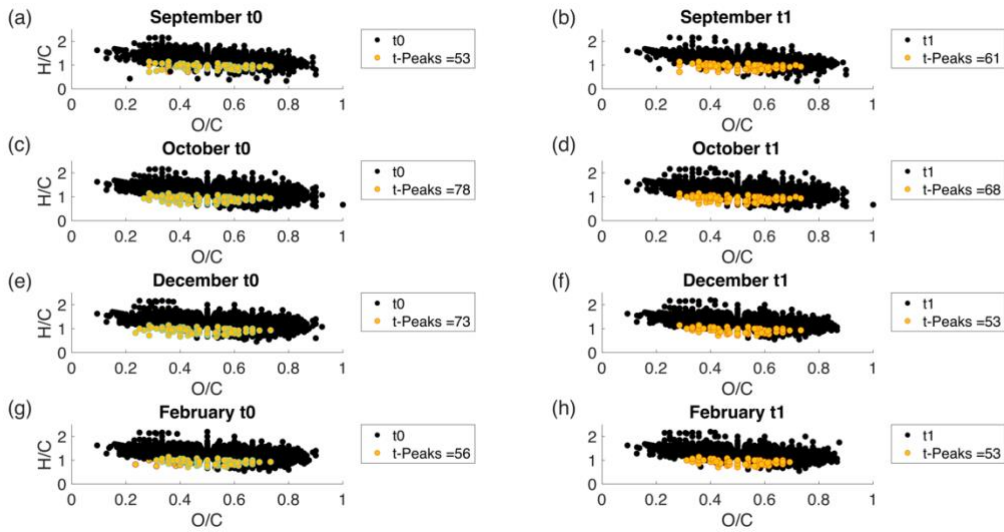

**Figure S7: van Krevelen diagram of t-Peaks during experiment months.** Each point is an identified molecular formula and plotted according to the oxygen to carbon (O/C) and hydrogen to carbon (H/C) atomic ratio of the molecular formula. a) start of incubation (t0) are shown in black and t-Peak molecular formulas are highlighted in orange. b) end of incubation (t1) (F treatment) are shown in black and t-Peak molecular formulas are highlighted in orange. T-peak molecular formulas are obtained from Medeiros et al. (2016). Results show significant decrease of t-Peaks in December incubations (t-test,  $p < 0.05$ ) and not significant in September, October and February incubations (t-test,  $p > 0.05$ ).

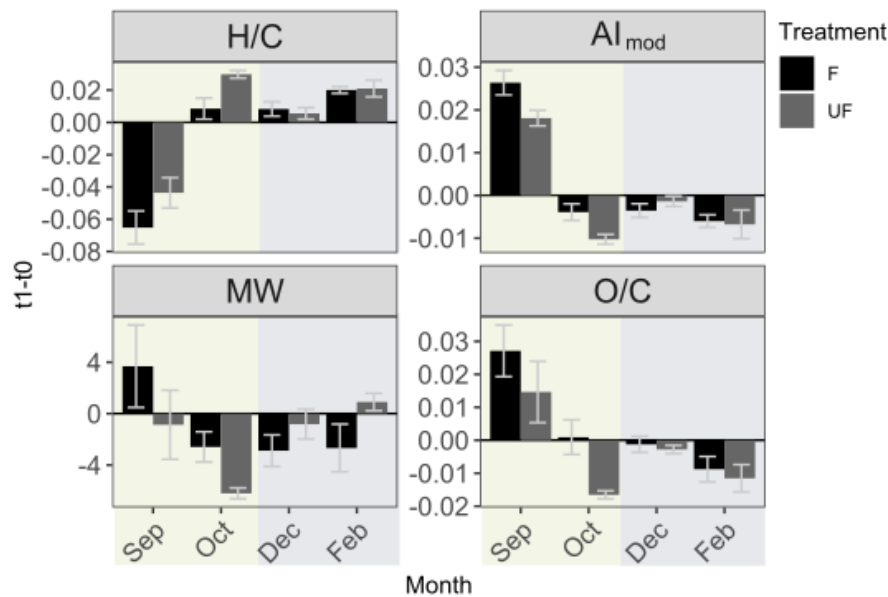

**Figure 5: Change of DOM parameters during experiment incubations.** a) change in intensity weighted average DOM parameters in seawater at t1 relative to t0. a) molecular weight (MW), b) oxygen to carbon ratio (O/C), c) hydrogen to carbon ratio (H/C), d) modified aromaticity index ( $AI_{mod}$ ). The first treatment is filtered (F) seawater at start and end of incubation (t1 – t0) and the second treatment is unfiltered (UF) seawater for the duration of the incubation then filtered immediately prior to sampling and compared to filtered at the start (t0) incubation (t1 – t0). The background colors indicate the statistically identified winter (blue) and biologically productive (green) period, respectively.

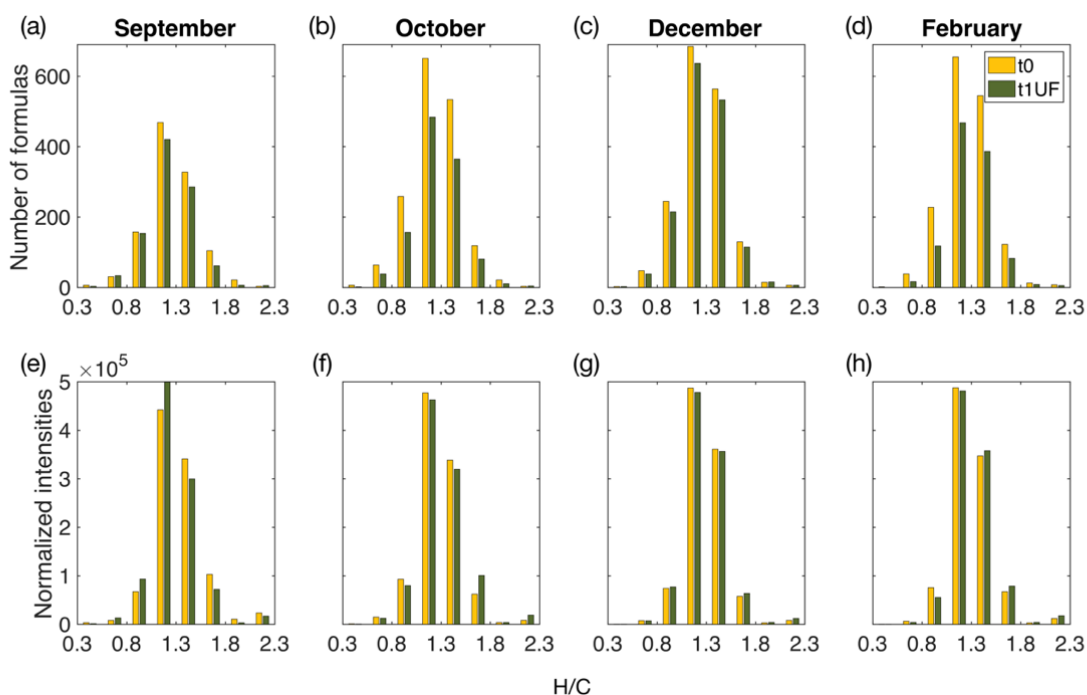

**Figure S5: Histograms of all identified organic matter formulas and normalized intensities determined by high-resolution mass spectrometry during start (t<sub>0</sub>) and end (t<sub>1</sub>) of incubations of UF treatment water.** Number of identified molecular formulas are plotted according to the hydrogen to carbon (H/C) atomic ratio for incubation experiments in a) September, b) October c) December and d) February. Normalized intensities are plotted according to H/C ratios for (e-h) for respective months. The start of the incubation (t<sub>0</sub>) is shown in yellow and the end of the incubation (t<sub>1</sub>) in green for UF treatment.
